# Supplementary material
Source: PubMed Central journal article supplement (PMC3608519)
Supplement: NIHMS441793-supplement-1.pdf [file NIHMS441793-supplement-1.pdf]

The following table shows the analysis of the  $V_H/N/D_H/N/J_H$  junction encoding the HCDR3. Underlined nucleotides indicate differences from the inferred germline gene segment.

| 3' end of $V_H$ gene | N addition region 1 | $D_H$ gene         | N addition region 2 | 5' end of $J_H$ gene       |
|----------------------|---------------------|--------------------|---------------------|----------------------------|
| tgtgcga....          | ccgcccc             | ...tatagcaccg..... | cc                  | .ctactttgacc <u>act</u> gg |
